# Supplementary material for: Characteristics and treatment effectiveness of the nummular headache: a systematic review and analysis of 110 cases
Source: PubMed Central journal article supplement — BMJ Neurol Open. 2020 Mar 12;2(1):e000049. doi: 10.1136/bmjno-2020-000049 (PMC7871727; doi:10.1136/bmjno-2020-000049), 2020-03-12
Supplement: bmjno-2020-000049supp002.pdf [file bmjno-2020-000049supp002.pdf]

| Author, Country, Year                | N of Cases | Age (years) | Gender | Age Group | Latency from first attack to diagnosis (months) | Age of onset of pain (years) | Intensity of pain VRS (1/10) | Duration of attacks (minutes) | Number of attacks per day | Frequency (days/month) | Timing of attacks | Localisation of pain | Region of brain | Diameter of the pain (cm) | Quality of pain | Tenderness | Exacerbating factors       | Concomitant symptoms     | Comorbidity if any           | Temporary relief | Total Resolution | Therapeutic Interventions                         | Oxaliplatin toxin A          | Triptan | TCA | Lamotrigine | Gabapentin | Carbamazepine |   |
|--------------------------------------|------------|-------------|--------|-----------|-------------------------------------------------|------------------------------|------------------------------|-------------------------------|---------------------------|------------------------|-------------------|----------------------|-----------------|---------------------------|-----------------|------------|----------------------------|--------------------------|------------------------------|------------------|------------------|---------------------------------------------------|------------------------------|---------|-----|-------------|------------|---------------|---|
| Study                                | N          | age         | gender | group     | latency                                         | onset                        | intensity                    | duration                      | attacks/day               | days/month             | time              | side                 | site            | size                      | quality         | tenderness | exacerbate                 | concomitant              | comorbidity                  | temporary relief | resolution       | rx                                                | botox                        | triptan | tca | lamotrigine | gabapentin | carbamazepine |   |
| Liu and Wu T, China, 2018            | 3          | 74          | F      | A         | 24                                              | 72                           |                              | <30                           |                           |                        |                   | L                    | Parietal        | 3                         | Stabbing        | N          |                            |                          |                              | Y                | Y                | Gabapentin                                        | N                            | N       | N   | N           | Y          | N             |   |
|                                      |            | 46          | M      | A         | 20                                              | 20                           |                              |                               |                           |                        |                   | R                    | Parietal        | 3                         | Stabbing        | N          |                            |                          |                              | N                | N                | Acetaminophen, Gabapentin                         | N                            | N       | N   | N           | Y          | N             |   |
|                                      |            | 38          | F      | A         | 2                                               | 38                           |                              | <30                           |                           |                        |                   | R                    | Parietal        | 3                         | Pulsating       | N          |                            |                          |                              | Y                | Y                | Acetaminophen, NSAIDs                             | N                            | N       | N   | N           | N          | N             |   |
| Hendriks et al., Spain, 2015         | 1          | 47          | F      | A         | 36                                              | 47                           |                              |                               |                           |                        |                   | BL                   | Parietal        | 4                         | Oppressive      | N          |                            |                          |                              | Y                | Y                | Gabapentin                                        | N                            | N       | N   | N           | Y          | N             |   |
| Carrillo et al., Spain, 2016         | 1          | 47          | M      | A         | 2                                               | 47                           |                              |                               |                           |                        |                   | R                    | Parietal        | 3                         | Stabbing        | N          |                            |                          |                              | Y                | Y                | Gabapentin, Carbamazepine                         | N                            | N       | N   | N           | Y          | N             |   |
| Bardic et al., Spain, 2015           | 1          | 21          | F      | A         | 36                                              | 18                           | 8                            | 30-120                        |                           | 9                      |                   | L                    | Parietal        | 5                         | Oppressive      | N          |                            | Phonophobia, Photophobia | None                         | N                | N                | NSAIDs, Triptans, Topiramate                      | N                            | N       | N   | N           | N          | N             |   |
| Lopez-Rodrigo et al., Spain, 2014    | 2          | 67          | M      | A         | 300                                             | 42                           | 8                            | 30-120                        |                           | 9                      |                   | R                    | Parietal        | 4                         | Oppressive      | Y          |                            | Abolysis                 | Aneurysm of bifurcation      | Y                | Y                | N                                                 | NSAIDs, Triptans, Topiramate | N       | Y   | N           | N          | N             | N |
|                                      |            | 60          | M      | A         | 48                                              | 56                           | 5                            | >120                          |                           | 4                      |                   | R                    | Parietal        | 5                         | Boring          | N          |                            | Hypersensitivity         | Aneurysm of occipital artery | Y                | Y                | N                                                 | Triptans                     | N       | Y   | N           | N          | N             | N |
| Jwański et al., Poland, 2014         | 1          | 61          | F      | A         | 12                                              | 60                           | 6                            | <30                           | 3                         |                        |                   | R                    | Parietal        | 6                         | Pressing        | Y          |                            | Abolysis                 | Aneurysm of occipital artery | Y                | N                | NSAIDs, Gabapentin                                | N                            | N       | N   | N           | Y          | N             |   |
| Kurita et al., USA, 2014             | 2          | 47          | F      | A         | 7                                               | 40                           | 6                            |                               |                           |                        |                   | L                    | Parietal        | 2                         | Burning         | N          |                            | None                     | None                         | Y                | Y                | NSAIDs                                            | N                            | N       | N   | N           | Y          | N             |   |
|                                      |            | 49          | F      | A         | 8                                               | 41                           | 8                            |                               |                           | 30                     |                   | R                    | Parietal        | 5                         | Sharp           | Y          |                            | None                     | None                         | Y                | Y                | Gabapentin                                        | N                            | N       | N   | N           | Y          | N             |   |
| Lopez-Montero et al., Spain, 2014    | 1          | 41          | F      | A         | 12                                              | 40                           | 4                            |                               |                           |                        |                   | L                    | Parietal        | 2                         | Pressing        | Y          |                            | None                     | None                         | Y                | Y                | Gabapentin                                        | N                            | N       | N   | N           | Y          | N             |   |
| Mukerji et al., Spain, 2012          | 2          | 21          | M      | A         | 4                                               | 21                           | 5                            |                               | 11                        |                        |                   | L                    | Parietal        | 6                         | Pressing        | N          |                            | None                     | None                         | Y                | Y                | Gabapentin                                        | N                            | N       | N   | N           | Y          | N             |   |
|                                      |            | 45          | M      | A         | 60                                              | 40                           | 8                            | <30                           |                           |                        |                   | R                    | Parietal        | 2                         | Stabbing        | N          |                            | None                     | None                         | Y                | Y                | NSAIDs                                            | N                            | N       | N   | N           | Y          | N             |   |
| Yin et al., India, 2013              | 1          | 52          | M      | A         | 180                                             | 20                           |                              | <30                           |                           |                        |                   | L                    | Parietal        | 4                         | Burning         | N          |                            | None                     | None                         | Y                | Y                | Gabapentin                                        | N                            | N       | N   | N           | Y          | N             |   |
| Torino et al., Spain, 2013           | 1          | 33          | F      | A         | 12                                              | 32                           | 6                            |                               | 2                         | 4                      |                   | L                    | Parietal        | 4                         | Electrical      | Y          |                            | None                     | None                         | Y                | Y                | Gabapentin                                        | N                            | N       | N   | N           | Y          | N             |   |
| Dhak et al., Japan, 2013             | 2          | 71          | M      | A         | 12                                              | 71                           |                              | >120                          |                           | 2                      |                   | R                    | Parietal        | 3                         | Boring          | Y          |                            | None                     | None                         | Y                | Y                | Physical activity                                 | Cephalexin, Abacavir         | Y       | Y   | Y           | Y          | Y             |   |
|                                      |            | 57          | F      | A         | 6.25                                            | 57                           | 4                            | <30                           |                           |                        |                   | BL                   | Parietal        | 3                         | Pressing        | N          |                            | None                     | None                         | Y                | Y                | NSAIDs, Nerve block                               | N                            | N       | N   | N           | Y          | N             |   |
| Dai et al., China, 2013              | 1          | 63          | M      | A         | 228                                             | 44                           | 9                            | 30-120                        |                           | 7                      |                   | L                    | Parietal        | 4                         | pressing        | N          |                            | None                     | None                         | Y                | Y                | NSAIDs, Amitriptyline                             | N                            | N       | Y   | N           | N          | N             |   |
| Herrera-Chiquena et al., Spain, 2013 | 3          | 46          | M      | A         | 228                                             | 44                           | 9                            | 30-120                        |                           | 7                      |                   | BL                   | Parietal        | 10                        | Pulsating       | N          |                            | None                     | None                         | Y                | N                | NSAIDs, Sodium Valproate, Amitriptyline           | N                            | N       | Y   | N           | N          | N             |   |
|                                      |            | 46          | M      | A         | 66                                              | 66                           | 7                            |                               |                           |                        |                   | R                    | Parietal        | 4                         | Pressing        | N          |                            | None                     | None                         | Y                | N                | NSAIDs, Carbamazepine                             | N                            | N       | N   | N           | Y          | Y             |   |
|                                      |            | 40          | F      | A         | 60                                              | 60                           | 5                            |                               |                           |                        |                   | R                    | Parietal        | 4                         | Burning         | N          |                            | None                     | None                         | Y                | N                | Gabapentin, Carbamazepine                         | N                            | N       | N   | N           | Y          | Y             |   |
|                                      |            | 23          | F      | A         | 23                                              | 6                            |                              |                               |                           |                        |                   | R                    | Parietal        | 3                         | Stabbing        | N          |                            | None                     | None                         | Y                | N                | Gabapentin, Carbamazepine                         | N                            | N       | N   | N           | Y          | Y             |   |
|                                      |            | 43          | M      | A         | 43                                              | 5                            |                              |                               |                           |                        |                   | R                    | Parietal        | 3                         | Stabbing        | N          |                            | None                     | None                         | Y                | N                | Gabapentin, Carbamazepine                         | N                            | N       | N   | N           | Y          | Y             |   |
|                                      |            | 51          | F      | A         | 51                                              | 5                            |                              |                               |                           |                        |                   | R                    | Parietal        | 3                         | Stabbing        | N          |                            | None                     | None                         | Y                | N                | Gabapentin, Carbamazepine                         | N                            | N       | N   | N           | Y          | Y             |   |
|                                      |            | 33          | M      | A         | 33                                              | 6                            |                              |                               |                           |                        |                   | R                    | Parietal        | 4                         | Pressing        | N          |                            | None                     | None                         | Y                | N                | NSAIDs, Carbamazepine                             | N                            | N       | N   | N           | Y          | Y             |   |
|                                      |            | 54          | F      | A         | 54                                              | 6                            |                              |                               |                           |                        |                   | R                    | Parietal        | 5                         | Burning         | N          |                            | None                     | None                         | Y                | N                | NSAIDs, Carbamazepine                             | N                            | N       | N   | N           | Y          | Y             |   |
|                                      |            | 42          | F      | A         | 42                                              | 7                            |                              |                               |                           |                        |                   | R                    | Parietal        | 5                         | Pressing        | N          |                            | None                     | None                         | Y                | N                | Lamotrigine                                       | N                            | N       | N   | N           | Y          | N             |   |
| Bisognini et al., China, 2010        | 1          | 59          | M      | A         | 1                                               | 59                           | 8                            | <30                           |                           |                        |                   | R                    | Parietal        | 6                         | Electric        | Y          |                            | None                     | None                         | Y                | Y                | Carbamazepine                                     | N                            | N       | N   | N           | Y          | N             |   |
| Yamamoto et al., Japan, 2011         | 1          | 28          | M      | A         | 2                                               | 28                           | 5                            |                               |                           |                        | Evening           | L                    | Parietal        | 3                         | Pressing        | Y          |                            | None                     | None                         | Y                | Y                | NSAIDs, Carbamazepine                             | N                            | N       | N   | N           | Y          | N             |   |
| Hicks-Pillay et al., Brazil, 2011    | 1          | 52          | F      | A         | 40                                              | 40                           | 6                            | <30                           | 3                         |                        |                   | R                    | Parietal        | 4                         | Pressing        | N          |                            | None                     | None                         | Y                | Y                | Lidocaine                                         | N                            | N       | N   | N           | Y          | N             |   |
| Porta-Eussamón et al., Japan, 2010   | 1          | 52          | F      | A         | 2                                               | 52                           | 4                            |                               |                           |                        |                   | R                    | Parietal        | 4                         | Pressing        | N          |                            | None                     | None                         | Y                | Y                | Lidocaine                                         | N                            | N       | N   | N           | Y          | N             |   |
| Chen et al., Taiwan, 2015            | 1          | 62          | M      | A         | 18                                              | 60                           | 6                            | <30                           |                           |                        |                   | L                    | Parietal        | 4                         | Electric        | N          |                            | None                     | None                         | Y                | N                | Chronic inflammatory demyelinating polyneuropathy | N                            | N       | N   | N           | Y          | N             |   |
| Garcera et al., Spain, 2011          | 6          | 43          | M      | A         | 12                                              | 40                           | 4                            |                               |                           |                        | Night             | R                    | Parietal        | 3                         | Pressing        | N          |                            | None                     | None                         | Y                | N                | NSAIDs                                            | N                            | N       | N   | N           | Y          | N             |   |
|                                      |            | 71          | F      | A         | 24                                              | 49                           | 5                            |                               |                           |                        |                   | BL                   | Parietal        | 4                         | Pressing        | N          |                            | None                     | None                         | Y                | N                | NSAIDs, Gabapentin                                | N                            | N       | N   | N           | Y          | N             |   |
|                                      |            | 60          | F      | A         | 60                                              | 30                           | 6                            |                               |                           |                        |                   | BL                   | Parietal        | 4                         | Stabbing        | N          |                            | None                     | None                         | Y                | N                | Carbamazepine                                     | N                            | N       | N   | N           | Y          | N             |   |
|                                      |            | 30          | F      | A         | 24                                              | 28                           | 2                            |                               |                           |                        | Night             | BL                   | Parietal        | 4                         | Pressing        | N          |                            | None                     | None                         | Y                | N                | NSAIDs                                            | N                            | N       | N   | N           | Y          | N             |   |
|                                      |            | 23          | M      | A         | 12                                              | 23                           | 2                            |                               |                           |                        |                   | R                    | Parietal        | 3                         | Stabbing        | N          |                            | None                     | None                         | Y                | N                | Gabapentin                                        | N                            | N       | N   | N           | Y          | N             |   |
|                                      |            | 33          | F      | A         | 24                                              | 12                           | 8                            | <30                           |                           | 30                     |                   | R                    | Parietal        | 4                         | Pressing        | N          |                            | None                     | None                         | Y                | Y                | Gabapentin                                        | N                            | N       | N   | N           | Y          | N             |   |
| Campbell et al., USA, 2013           | 1          | 47          | F      | A         | 14                                              | 47                           |                              |                               |                           |                        |                   | R                    | Parietal        | 4                         | Pressing        | N          |                            | None                     | None                         | Y                | Y                | Gabapentin                                        | N                            | N       | N   | N           | Y          | N             |   |
| Evans et al., Spain, 2005            | 1          | 57          | F      | A         | 3                                               | 57                           | 5                            | 30-120                        |                           | 30                     |                   | R                    | Parietal        | 5                         | Burning         | N          |                            | None                     | None                         | Y                | Y                | Gabapentin                                        | N                            | N       | N   | N           | Y          | N             |   |
| Frances et al., Italy, 2006          | 1          | 55          | F      | A         | 12                                              | 55                           | 4                            |                               |                           |                        |                   | L                    | Parietal        | 3                         | Pressing        | N          |                            | None                     | None                         | Y                | Y                | Cervical massage, Gabapentin                      | N                            | N       | N   | N           | Y          | N             |   |
| Evans et al., Spain, 2006            | 1          | 45          | F      | A         | 3                                               | 45                           | 5                            |                               |                           |                        |                   | R                    | Parietal        | 5                         | Burning         | N          |                            | None                     | None                         | Y                | Y                | Gabapentin                                        | N                            | N       | N   | N           | Y          | N             |   |
| Trenon et al., Italy, 2007           | 1          | 36          | F      | A         | 12                                              | 36                           | 5                            |                               |                           |                        | Evening           | L                    | Parietal        | 4                         | Pressing        | Y          |                            | None                     | None                         | Y                | Y                | Gabapentin                                        | N                            | N       | N   | N           | Y          | N             |   |
| Carlson et al., USA, 2007            | 1          | 60          | F      | A         | 12                                              | 59                           | 6                            |                               |                           |                        |                   | L                    | Parietal        | 4                         | Pressing        | Y          |                            | None                     | None                         | Y                | Y                | Surgical removal of mass                          | N                            | N       | N   | N           | Y          | N             |   |
| Taylor et al., USA, 2008             | 1          | 47          | M      | A         | 60                                              | 43                           | 10                           |                               |                           |                        |                   | R                    | Parietal        | 6                         | Throbbing       | N          |                            | None                     | None                         | Y                | N                | NSAIDs, Carbamazepine, Lamotrigine                | N                            | N       | N   | Y           | N          | Y             |   |
| Pavija et al., Spain, 2008           | 5          | 65          | F      | A         | 36                                              | 62                           | 8                            |                               |                           |                        |                   | R                    | Parietal        | 4.5                       | Stabbing        | N          |                            | None                     | None                         | Y                | N                | NSAIDs, Carbamazepine, Lamotrigine                | N                            | N       | N   | N           | Y          | N             |   |
|                                      |            | 50          | F      | A         | 72                                              | 44                           | 3                            |                               |                           |                        |                   | R                    | Parietal        | 2                         | Pressing        | N          |                            | None                     | None                         | Y                | Y                | NSAIDs, Carbamazepine                             | N                            | N       | N   | N           | Y          | N             |   |
|                                      |            | 61          | F      | A         | 24                                              | 59                           | 3                            |                               |                           |                        |                   | R                    | Parietal        | 2.5                       | Pressing        | N          |                            | None                     | None                         | Y                | Y                | NSAIDs, Carbamazepine                             | N                            | N       | N   | N           | Y          | N             |   |
|                                      |            | 40          | M      | A         | 12                                              | 39                           | 3                            |                               |                           |                        |                   | L                    | Parietal        | 4                         | Pressing        | N          |                            | None                     | None                         | Y                | Y                | NSAIDs, Carbamazepine                             | N                            | N       | N   | N           | Y          | N             |   |
|                                      |            | 24          | F      | A         | 24                                              | 24                           | 8                            |                               |                           |                        |                   | R                    | Parietal        | 3                         | Stabbing        | N          |                            | None                     | None                         | Y                | Y                | NSAIDs, Carbamazepine                             | N                            | N       | N   | N           | Y          | N             |   |
| Mathew et al., USA, 2008             | 4          | 43          | F      | A         | 60                                              | 38                           | 6                            |                               |                           |                        |                   | R                    | Parietal        | 6                         | Y               |            | Cumulative trauma disorder | None                     | None                         | Y                | Y                | NSAIDs, Carbamazepine                             | N                            | N       | N   | N           | Y          | N             |   |
|                                      |            | 58          | F      | A         | 36                                              | 55                           | 6                            |                               |                           |                        |                   | R                    | Parietal        | 6                         | N               |            | None                       | None                     | Y                            | Y                | Y                | NSAIDs, Carbamazepine                             | N                            | N       | N   | N           | Y          | N             |   |
|                                      |            | 35          | F      | A         | 24                                              | 33                           | 6                            |                               |                           |                        |                   | L                    | Parietal        | 4                         | Y               |            | None                       | None                     | Y                            | Y                | Y                | NSAIDs, Carbamazepine                             | N                            | N       | N   | N           | Y          | N             |   |
|                                      |            | 47          | F      | A         | 60                                              | 42                           | 6                            |                               |                           |                        |                   | R                    | Parietal        | 3                         | Y               |            | None                       | None                     | Y                            | Y                | Y                | NSAIDs, Carbamazepine                             | N                            | N       | N   | N           | Y          | N             |   |
| Baldock et al., Italy, 2010          | 1          | 40          | M      | A         | 6                                               | 39.5                         | 6                            | >120                          | 3                         |                        |                   | R                    | Parietal        | 2.1                       | Pressing        | Y          |                            | None                     | None                         | Y                | Y                | Lidocaine                                         | N                            | N       | N   | N           | Y          | N             |   |
| Dhak et al., Spain, 2006             | 2          | 41          | F      | A         | 12                                              | 39                           | 6</                          |                               |                           |                        |                   |                      |                 |                           |                 |            |                            |                          |                              |                  |                  |                                                   |                              |         |     |             |            |               |   |

|                            |                   |    |   |   |         |    |   |              |     |    |  |      |                               |        |                    |   |              |                          |                                                   |   |   |                                         |   |   |   |   |   |   |
|----------------------------|-------------------|----|---|---|---------|----|---|--------------|-----|----|--|------|-------------------------------|--------|--------------------|---|--------------|--------------------------|---------------------------------------------------|---|---|-----------------------------------------|---|---|---|---|---|---|
|                            |                   | 20 | F | A | 36      | 36 | 5 | <30          |     | 4  |  | L    | Parietal                      | 1      | Pressing           | Y |              | Paresthesia              | Migraine                                          | Y | Y | Gabapentin, Duloxetine, Oxcarbazepine/A | Y | N | N | N | Y | N |
|                            |                   | 49 | M | A | 0.5     | 49 | 4 | <120         |     |    |  | R    | Parietal                      | 2      | Pressing           | N |              |                          | IBV, Migraine                                     | N | N |                                         |   |   |   |   |   |   |
|                            |                   | 24 | M | A | 5       | 24 | 5 | 30-120       | 3   |    |  | L    | Parietal                      | 4      | Pressing           | Y |              |                          | Asthma                                            | Y | Y | Acetaminophen, NSAIDs, Amitriptyline    | N | N | Y | N | N | N |
|                            |                   | 57 | F | A | 0.25    | 57 | 8 | <30          | >30 |    |  | R    | Parietal                      | 5      | Lancinating        | Y |              |                          | Migraine, Chronic tension headache                | Y | Y |                                         | N | N | N | N | N | N |
| Hong et al. China; 2019    | 2                 | 48 | F | A | 132     | 37 | 8 | <120         |     | 2  |  | L    | Parietal                      | 3      | Burning            | N |              | Nausea, Loss of Appetite |                                                   | N | N | Metoprolol                              | N | N | N | N | N | N |
|                            |                   | 72 | M | A | 120     | 60 | 8 | 30-120       |     | 2  |  | L    | Parietal                      | 6      | Throbbing          | N |              | Hypoaesthesia            |                                                   | Y | N | Metoprolol                              | N | N | N | N | N | N |
| Greenberg et al. USA; 2007 | 1                 | 55 | M | A | 8       | 55 | 8 | <30          | 6   | 12 |  | L    | Parietal                      | 5      | Throbbing          | Y |              | Phonophobia, Allodynia   |                                                   | Y | Y | Nortriptyline                           | N | N | Y | N | N | N |
| Pareja et al. Spain; 2004  | 3 Male, 11 Female | 38 |   | A | 1 to 60 |    | 7 | 20-120, <120 |     |    |  | R    | Parietal, Temporal            | 1 to 6 | Pressing           | Y | Combing hair | Hypoaesthesia, Abolysis  | Epilepsy, Trauma, Migraine, Tension type Headache |   |   |                                         |   |   |   |   |   |   |
| Pareja et al. Spain; 2002  | 5 Male, 8 Female  | 50 |   | A | 3.7     |    | 5 | 30-120       |     |    |  | R, L | Occipital, Parietal, Temporal | 2,3    | Pressing, Stabbing | Y |              | Hypoaesthesia            | Tension type Headache                             |   |   |                                         |   |   |   |   |   |   |
